# Supplementary material
Source: PubMed Central journal article supplement (PMC4235520)

# Supporting Information

Sequence, Cloning, and Analysis of the Fluvirucin B<sub>1</sub> Polyketide Synthase from *Actinomadura vulgaris*

Tsung-Yi Lin, Lawrence S. Borketey, Gitanjali Prasad, Stephanie A. Waters, and Nathan A. Schnarr\*

*Department of Chemistry, University of Massachusetts, 710 N. Pleasant Street, Amherst, Massachusetts 01003*

[schnarr@chem.umass.edu](mailto:schnarr@chem.umass.edu)

|                                               |     |
|-----------------------------------------------|-----|
| AT Specificity Results                        | S2  |
| Sequence Comparisons for Flu and DEBS Modules | S4  |
| Protein homology analysis of Flu-KR Sequence  | S5  |
| PAGE analysis of Fluvirucin KSATs and ACPs    | S6  |
| Flu-ACP loading experiment by AT              | S7  |
| Flu-KSAT3 loading                             | S11 |
| NMR spectra                                   | S12 |

Figure S1. Expected AT Specificities : Results from SEARCHPKS

## Mod 1

**Matching all known AT domains with your sequence**

Query is the potential *AT* in your sequence

| DOMAIN                         | E-VALUE | %IDENTITY | %POSITIVES | Substrate      | ActivesiteMotif |
|--------------------------------|---------|-----------|------------|----------------|-----------------|
| Your_AT_sequence               |         |           |            |                | QQGHSQGRSHTNV   |
| <a href="#">nidda_mod04_AT</a> | 7e-85   | 53        | 65         | Methylmalonate | QQGHSQGRSHTNV   |
| <a href="#">ampho_mod01_AT</a> | 1e-81   | 49        | 62         | Methylmalonate | QQGHSQGRSHTSV   |
| <a href="#">nidda_mod05_AT</a> | 3e-81   | 48        | 63         | Ethylmalonate  | QQGHSQGRGHTNV   |
| <a href="#">rifam_mod07_AT</a> | 7e-81   | 50        | 62         | Methylmalonate | QQGHSQGRSHTNV   |
| <a href="#">rifam_mod04_AT</a> | 2e-80   | 50        | 63         | Methylmalonate | QQGHSQGRSHTNV   |
| <a href="#">ampho_mod11_AT</a> | 1e-79   | 48        | 63         | Methylmalonate | QQGHSQGRSHTSV   |
| <a href="#">pimar_mod07_AT</a> | 3e-79   | 50        | 62         | Methylmalonate | QQGHSQGRSHTNV   |
| <a href="#">averm_mod01_AT</a> | 4e-79   | 50        | 63         | Methylmalonate | QQGHSQGRSHTNV   |
| <a href="#">averm_mod07_AT</a> | 4e-79   | 50        | 63         | Methylmalonate | QQGHSQGRSHTNV   |
| <a href="#">nysta_mod01_AT</a> | 4e-78   | 49        | 61         | Methylmalonate | QQGHSQGRSHTNV   |

## Mod2

**Matching all known AT domains with your sequence**

Query is the potential *AT* in your sequence

| DOMAIN                         | E-VALUE | %IDENTITY | %POSITIVES | Substrate | ActivesiteMotif |
|--------------------------------|---------|-----------|------------|-----------|-----------------|
| Your_AT_sequence               |         |           |            |           | QQGHSLGRFHNV    |
| <a href="#">averm_mod08_AT</a> | 4e-87   | 56        | 63         | Malonate  | QQGHSLGRFHAQV   |
| <a href="#">averm_mod04_AT</a> | 9e-87   | 56        | 63         | Malonate  | QQGHSLGRFHAQV   |
| <a href="#">averm_mod02_AT</a> | 1e-86   | 57        | 64         | Malonate  | QQGHSLGRFHAQV   |
| <a href="#">averm_mod03_AT</a> | 1e-86   | 56        | 63         | Malonate  | QQGHSLGRFHAQV   |
| <a href="#">averm_mod05_AT</a> | 3e-86   | 56        | 63         | Malonate  | QQGHSLGRFHAQV   |
| <a href="#">ampho_mod13_AT</a> | 3e-82   | 49        | 65         | Malonate  | QQGHSIGRFHTHV   |
| <a href="#">nysta_mod13_AT</a> | 6e-79   | 48        | 63         | Malonate  | QQGHSIGRFHTHV   |
| <a href="#">ampho_mod03_AT</a> | 8e-79   | 47        | 63         | Malonate  | QQGHSIGRFHNV    |
| <a href="#">nysta_mod04_AT</a> | 3e-78   | 50        | 65         | Malonate  | QQGHSIGRFHNV    |
| <a href="#">nysta_mod03_AT</a> | 9e-78   | 47        | 63         | Malonate  | QQGHSIGRFHNV    |

## Mod3

**Matching all known AT domains with your sequence**

Query is the potential *AT* in your sequence

| DOMAIN                         | E-VALUE | %IDENTITY | %POSITIVES | Substrate      | ActivesiteMotif |
|--------------------------------|---------|-----------|------------|----------------|-----------------|
| Your_AT_sequence               |         |           |            |                | QQGHSQGRSHTNV   |
| <a href="#">pimar_mod07_AT</a> | e-104   | 61        | 73         | Methylmalonate | QQGHSQGRSHTNV   |
| <a href="#">ampho_mod11_AT</a> | e-101   | 58        | 72         | Methylmalonate | QQGHSQGRSHTSV   |
| <a href="#">ampho_mod01_AT</a> | 1e-98   | 57        | 70         | Methylmalonate | QQGHSQGRSHTSV   |
| <a href="#">nysta_mod01_AT</a> | 4e-98   | 58        | 71         | Methylmalonate | QQGHSQGRSHTNV   |
| <a href="#">nysta_mod11_AT</a> | 7e-98   | 58        | 71         | Methylmalonate | QQGHSQGRSHTNV   |
| <a href="#">nidda_mod04_AT</a> | 9e-98   | 58        | 68         | Methylmalonate | QQGHSQGRSHTNV   |
| <a href="#">sorap_mod07_AT</a> | 3e-93   | 55        | 68         | Glycerate      | QQGHSQGRSHTNV   |
| <a href="#">clean_mod03_AT</a> | 1e-92   | 55        | 66         | Methylmalonate | QQGHSQGRSHTNV   |
| <a href="#">rifam_mod03_AT</a> | 2e-92   | 54        | 69         | Methylmalonate | QQGHSQGRSHTNV   |
| <a href="#">clean_mod01_AT</a> | 3e-92   | 55        | 66         | Methylmalonate | QQGHSQGRSHTNV   |

## Mod4

## Matching all known AT domains with your sequence

Query is the potential *AT* in your sequence

| DOMAIN                         | E-VALUE | %IDENTITY | %POSITIVES | Substrate | ActivesiteMotif |
|--------------------------------|---------|-----------|------------|-----------|-----------------|
| <b>Your_AT_sequence</b>        |         |           |            |           |                 |
| <a href="#">averm mod08 AT</a> | 2e-74   | 52        | 58         | Malonate  | QQGHSLGR-RTQV   |
| <a href="#">averm mod04 AT</a> | 3e-74   | 52        | 58         | Malonate  | QQGHSLGRFHAQV   |
| <a href="#">averm mod02 AT</a> | 7e-74   | 52        | 58         | Malonate  | QQGHSLGRFHAQV   |
| <a href="#">averm mod03 AT</a> | 7e-74   | 52        | 58         | Malonate  | QQGHSLGRFHAQV   |
| <a href="#">averm mod05 AT</a> | 2e-73   | 52        | 58         | Malonate  | QQGHSLGRFHAQV   |
| <a href="#">ampho mod13 AT</a> | 2e-68   | 45        | 60         | Malonate  | QQGHSIGRFHTHV   |
| <a href="#">nysta mod04 AT</a> | 5e-66   | 46        | 60         | Malonate  | QQGHSIGRFHNV    |
| <a href="#">ampho mod03 AT</a> | 2e-65   | 43        | 58         | Malonate  | QQGHSIGRFHNV    |
| <a href="#">nysta mod03 AT</a> | 7e-65   | 43        | 57         | Malonate  | QQGHSIGRFHNV    |
| <a href="#">pimar mod05 AT</a> | 2e-63   | 44        | 57         | Malonate  | QQGHSIGRFHGHV   |

## Mod5

## Matching all known AT domains with your sequence

Query is the potential *AT* in your sequence

| DOMAIN                         | E-VALUE | %IDENTITY | %POSITIVES | Substrate      | ActivesiteMotif |
|--------------------------------|---------|-----------|------------|----------------|-----------------|
| <b>Your_AT_sequence</b>        |         |           |            |                |                 |
| <a href="#">nidda mod04 AT</a> | 7e-85   | 53        | 65         | Methylmalonate | QQGHSQGRSHTNV   |
| <a href="#">ampho mod01 AT</a> | 1e-81   | 49        | 62         | Methylmalonate | QQGHSQGRSHTSV   |
| <a href="#">nidda mod05 AT</a> | 3e-81   | 48        | 63         | Ethylmalonate  | QQGHSQGRGHTNV   |
| <a href="#">rifam mod04 AT</a> | 3e-81   | 50        | 63         | Methylmalonate | QQGHSQGRSHTNV   |
| <a href="#">rifam mod07 AT</a> | 7e-81   | 50        | 62         | Methylmalonate | QQGHSQGRSHTNV   |
| <a href="#">pimar mod07 AT</a> | 5e-80   | 50        | 62         | Methylmalonate | QQGHSQGRSHTNV   |
| <a href="#">ampho mod11 AT</a> | 1e-79   | 48        | 63         | Methylmalonate | QQGHSQGRSHTSV   |
| <a href="#">averm mod01 AT</a> | 3e-79   | 50        | 63         | Methylmalonate | QQGHSQGRSHTNV   |
| <a href="#">averm mod07 AT</a> | 3e-79   | 50        | 63         | Methylmalonate | QQGHSQGRSHTNV   |
| <a href="#">nysta mod01 AT</a> | 4e-78   | 49        | 61         | Methylmalonate | QQGHSQGRSHTNV   |

### Sequence Comparison Results for Flu and DEBS Modules

All sequence comparison done by BLAST of NCBI website. All modules listed in the column are used as query, and the modules listed in the row are used as subject.

Note1: In cases where the compared modules are of dramatically different sizes (i.e Flu Mod 1 vs. Flu Mod2) identities are related only to the KS-AT regions (regions of max identity) of the modules.

Note2: Comparison results in parentheses are results from reverse query/subject pairs.

| <b>Sequence comparison<br/>(Identities/Similarities)</b> | Flu_Mod1         | Flu_Mod2         | Flu_Mod3         | Flu_Mod4         | Flu_Mod5         | DEBS_Mod4      |
|----------------------------------------------------------|------------------|------------------|------------------|------------------|------------------|----------------|
| Flu_Mod1                                                 | <b>100%/100%</b> | <b>61%/72%</b>   | <b>81%/86%</b>   | <b>60%/70%</b>   | <b>80%/86%</b>   | <b>49%/61%</b> |
| Flu_Mod2                                                 | <b>61%/72%</b>   | <b>100%/100%</b> | <b>64%/75%</b>   | <b>95%/96%</b>   | <b>64%/75%</b>   | <b>58%/72%</b> |
| Flu_Mod3                                                 | <b>81%/86%</b>   | <b>64%/75%</b>   | <b>100%/100%</b> | <b>63%/73%</b>   | <b>74%/82%</b>   | <b>50%/63%</b> |
| Flu_Mod4                                                 | <b>60%/70%</b>   | <b>94%/96%</b>   | <b>63%/73%</b>   | <b>100%/100%</b> | <b>60%/70%</b>   | <b>41%/56%</b> |
| Flu_Mod5                                                 | <b>80%/86%</b>   | <b>64%/75%</b>   | <b>75%/82%</b>   | <b>60%/70%</b>   | <b>100%/100%</b> | <b>49%/62%</b> |

| <b>Sequence comparison<br/>(Identities/Similarities)</b> | DEBS_Mod1        | DEBS_Mod2        | DEBS_Mod3         | DEBS_Mod4        | DEBS_Mod5        | DEBS_Mod6        |
|----------------------------------------------------------|------------------|------------------|-------------------|------------------|------------------|------------------|
| DEBS_Mod1                                                | <b>100%/100%</b> | <b>49%/60%</b>   | <b>48%/61%</b>    | <b>56%/68%</b>   | <b>49%/61%</b>   | <b>59%/68%</b>   |
| DEBS_Mod2                                                | <b>(49%/60%)</b> | <b>100%/100%</b> | <b>48%/59%</b>    | <b>52%/64%</b>   | <b>50%/61%</b>   | <b>49%/61%</b>   |
| DEBS_Mod3                                                | <b>(48%/61%)</b> | <b>(48%/59%)</b> | <b>100%/100%</b>  | <b>56%/69%</b>   | <b>48%/62%</b>   | <b>51%/64%</b>   |
| DEBS_Mod4                                                | <b>(56%/68%)</b> | <b>(52%/64%)</b> | <b>(56%/69%)</b>  | <b>100%/100%</b> | <b>57%/68%</b>   | <b>(52%/64%)</b> |
| DEBS_Mod5                                                | <b>(49%/61%)</b> | <b>(50%/61%)</b> | <b>(48%/62%)</b>  | <b>57%/69%</b>   | <b>100%/100%</b> | <b>(50%/61%)</b> |
| DEBS_Mod6                                                | <b>(59%/68%)</b> | <b>(49%/61%)</b> | <b>(51%/64%),</b> | <b>52%/64%</b>   | <b>50%/61%</b>   | <b>100%/100%</b> |

## Protein homology analysis of Flu-KR Sequence

KR domain comparison between Fluvirucin modules and other B1 type KR domains. The homology analyses are done by Clustal Omega method of EMBL-EBI website, compared with the results in the reference.

Ref: Keatinge-Clay, A. T. *Chemistry & Biology*, 2007, 14, 898-908

| <u>Module</u> | <u>Loop</u>  | <u>Catalytic region</u> | <u>Lid</u>                   |
|---------------|--------------|-------------------------|------------------------------|
| Ave1          | HTAGILDDAT-L | SSAAATFGAPGQANYAAANA    | WGTWQGNG--LA--DSDKARAYLDRRG  |
| Tyl1          | HTAGILDDAV-I | SSVTGTWGNAGQGAYAAANA    | WGLWGGG--GM---AAGAGEESLSRRG  |
| Asc8          | HTAATLDDGI-L | SSAAAVLGSPGQGNYYAAANA   | WGMWHTT-STLTGQLDDADRDRIRRG   |
| Ave7          | HAAGVLDDAT-I | SSAAGILGSAGQGNYYAAANA   | dh                           |
| Ave9          | HAAGVLDDAT-I | SSAAGILGSAGQGNYYAAANA   | WGLWEEA-SGMTGHLAGTDHRRRIIRSG |
| Rap10         | HTAGVLDDGV-V | SSAAGVLGSAGQGNYYAVANA   | dh                           |
| Flu1          | HTAGVLDDGV-V | SSSAATLDSAGQGNYYSAANA   | WGLWEEA-SGMTGHLAGTDHRRRIIRSG |
| Flu2          | HAAGVGHDDVLV | SSGAAVWGSSGQASYAAANA    | DH                           |
| Flu3          | HTAGVLDDGV-V | SSSAATLDSAGQGNYYSAANA   | WGLWEDA-SGLTAKLTGTDHDRIRRS   |
| Flu4          | HAAGVVDGVI   | SSSAATLDSAGQGNYYSAANA   | DH                           |
| Flu5          | HTAGVLDDGV-V | SSSAGTLDSAGQGNYYSAANA   | WGLWHQP-SGMSAHLTTTDITRIEQAG  |
|               | *.* . * :    | ** :. *_.*.***          | WGGWGGG--GM---MEDAGE-QLGRSG  |
|               |              |                         | WGLWAPETGGMTNQLSELDLERLSRSG  |
|               |              |                         | WGVWAPETGGMTRQLGDIDLERLSRSG  |
|               |              |                         | WGLWHQP-SGMSAHLTTTDITRIEQAG  |
|               |              |                         | ** * : : : *                 |

Note: DH, functional; dh, nonfunctional

PKS abbreviations:

Ave: Avermectin

Tyl: Tylosin

Asc: Ascomycin

Rap: Rapamycin

Flu: Fluvirucin B<sub>1</sub>

**Figure S2. PAGE of Fluvirucin KSATs and ACPs on 4-20% gel**

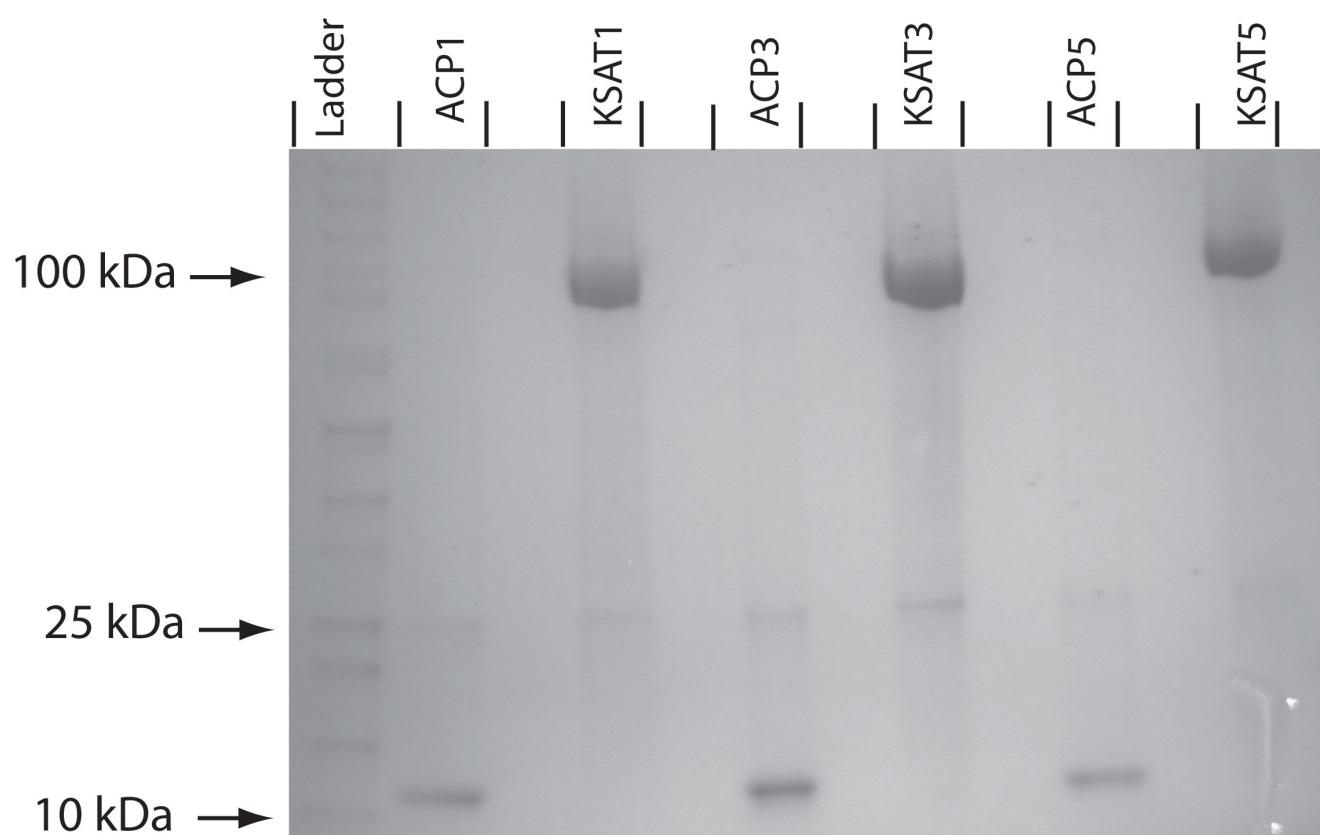

**Flu-ACP loading experiment by AT:**

To a mixture of ACP (50  $\mu$ M) and KS-AT (2  $\mu$ M) in 100mM pH 7.0 phosphate buffer (50  $\mu$ L total volume) containing 2.5 mM TCEP at 4 $^{\circ}$ C was added appropriate SNAc thioester substrate (500  $\mu$ M). The mixture was incubated 4  $^{\circ}$ C for 30 min to achieve AT assisted acylation of the ACP. Sequence grade modified trypsin was added to prepare samples with final ratio trypsin:ACP to be 1:10 (w/w). The mixture was incubated for 60 min at 37  $^{\circ}$ C. Digestion was quenched by addition of equal volume of 10% formic acid. Digests were stored at -80  $^{\circ}$ C until analysis.

ACP loading:

| Protein  | Probe               | Mass expected (m/z, z=+3) |
|----------|---------------------|---------------------------|
| ACP1/3/5 | -                   | 896.8                     |
| ACP1/3/5 | Ethyl-malonyl-SNAc  | 954.3                     |
| ACP1/3/5 | Methyl-malonyl-SNAc | 947.3                     |
| ACP1/3/5 | Malonyl-SNAc        | 940.4                     |

Figure S3. FluAT1 substrate selectivity

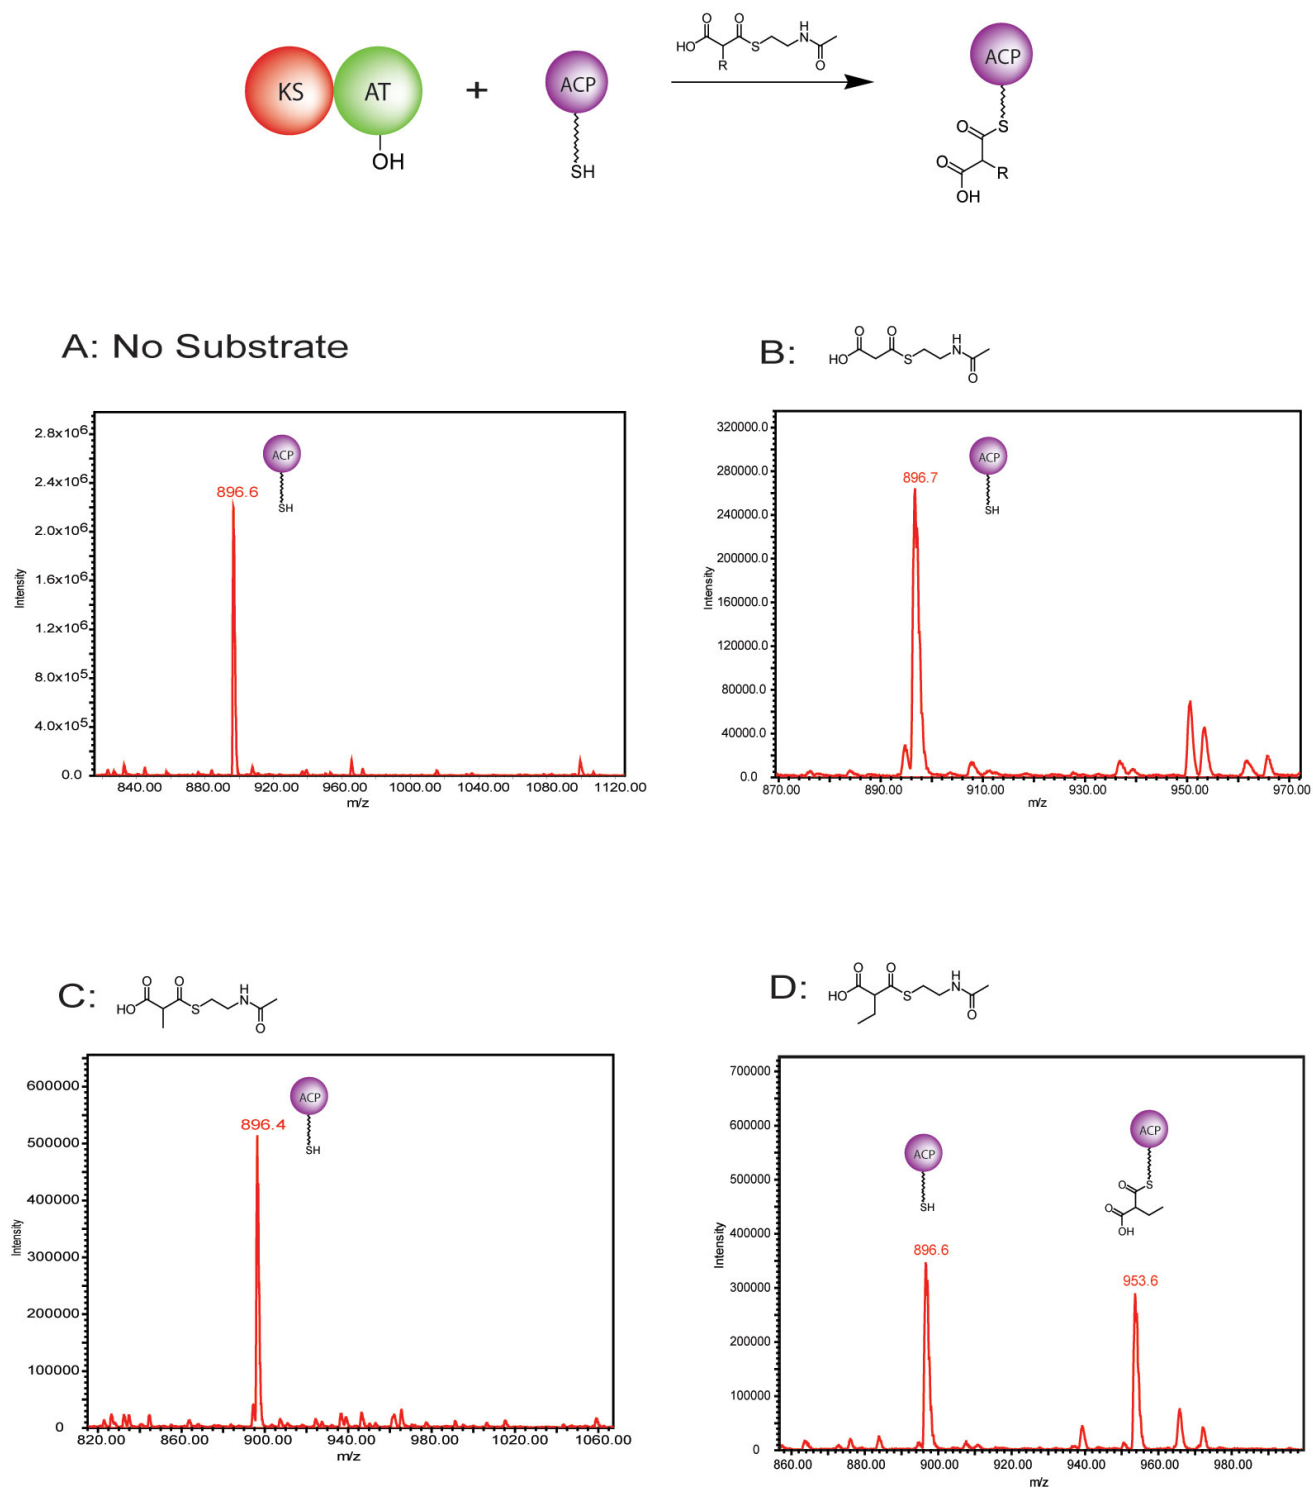



Figure S4. FluAT3 substrate selectivity

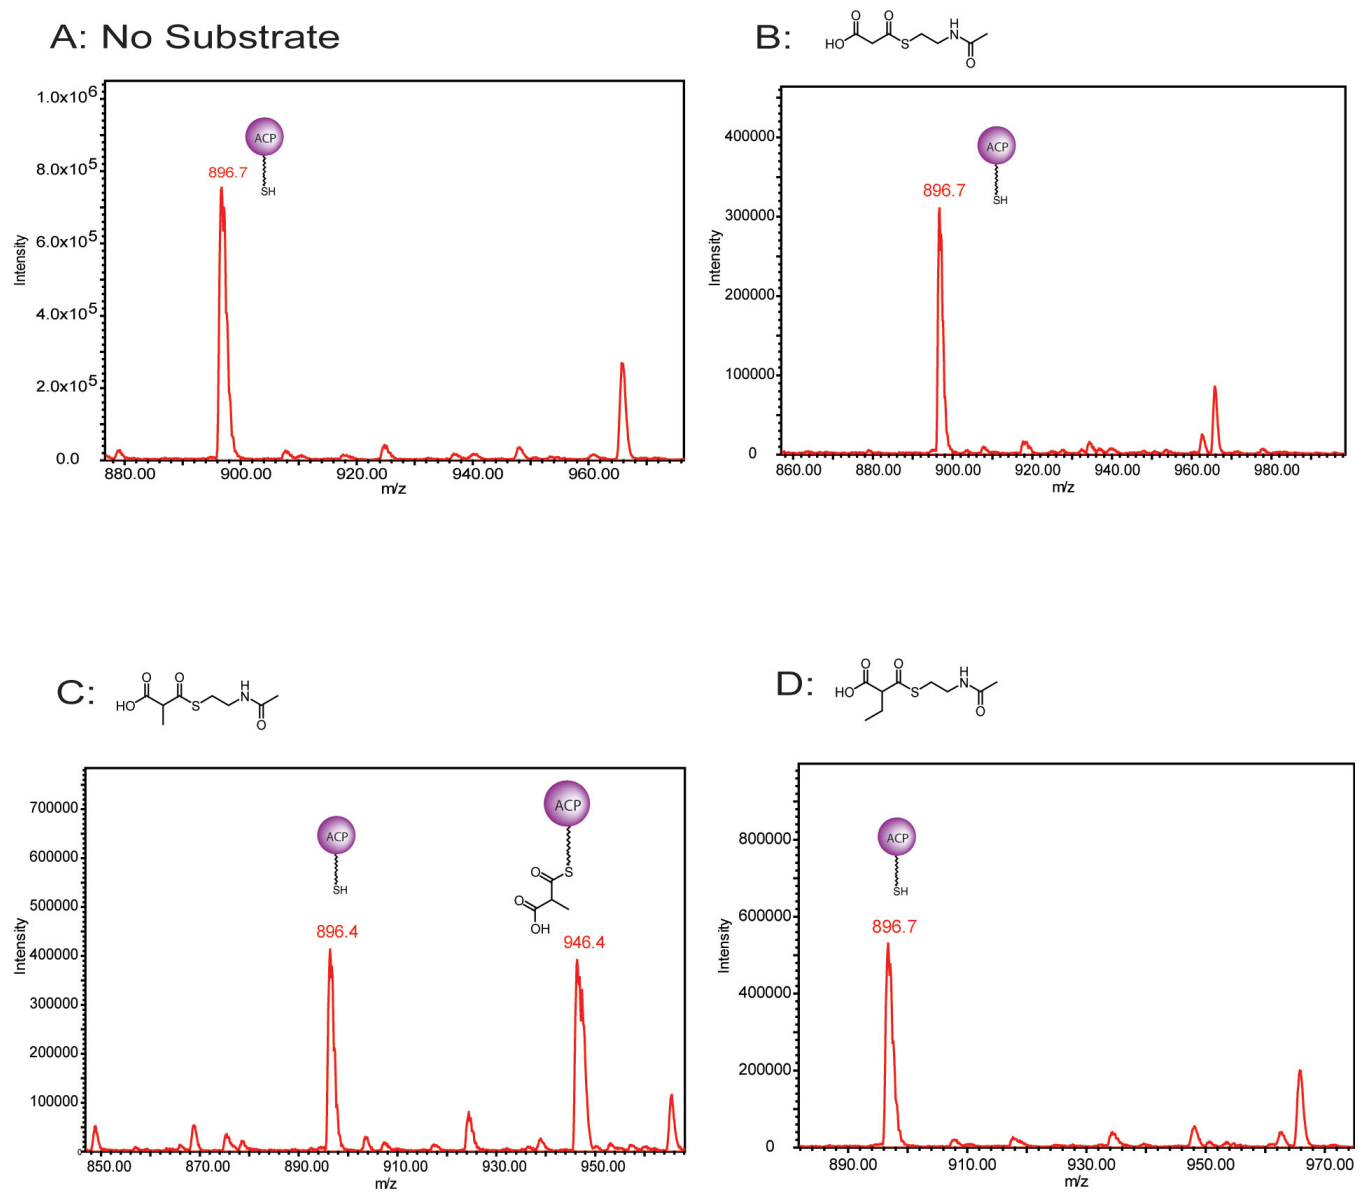

Figure S5. FluAT5 substrate selectivity

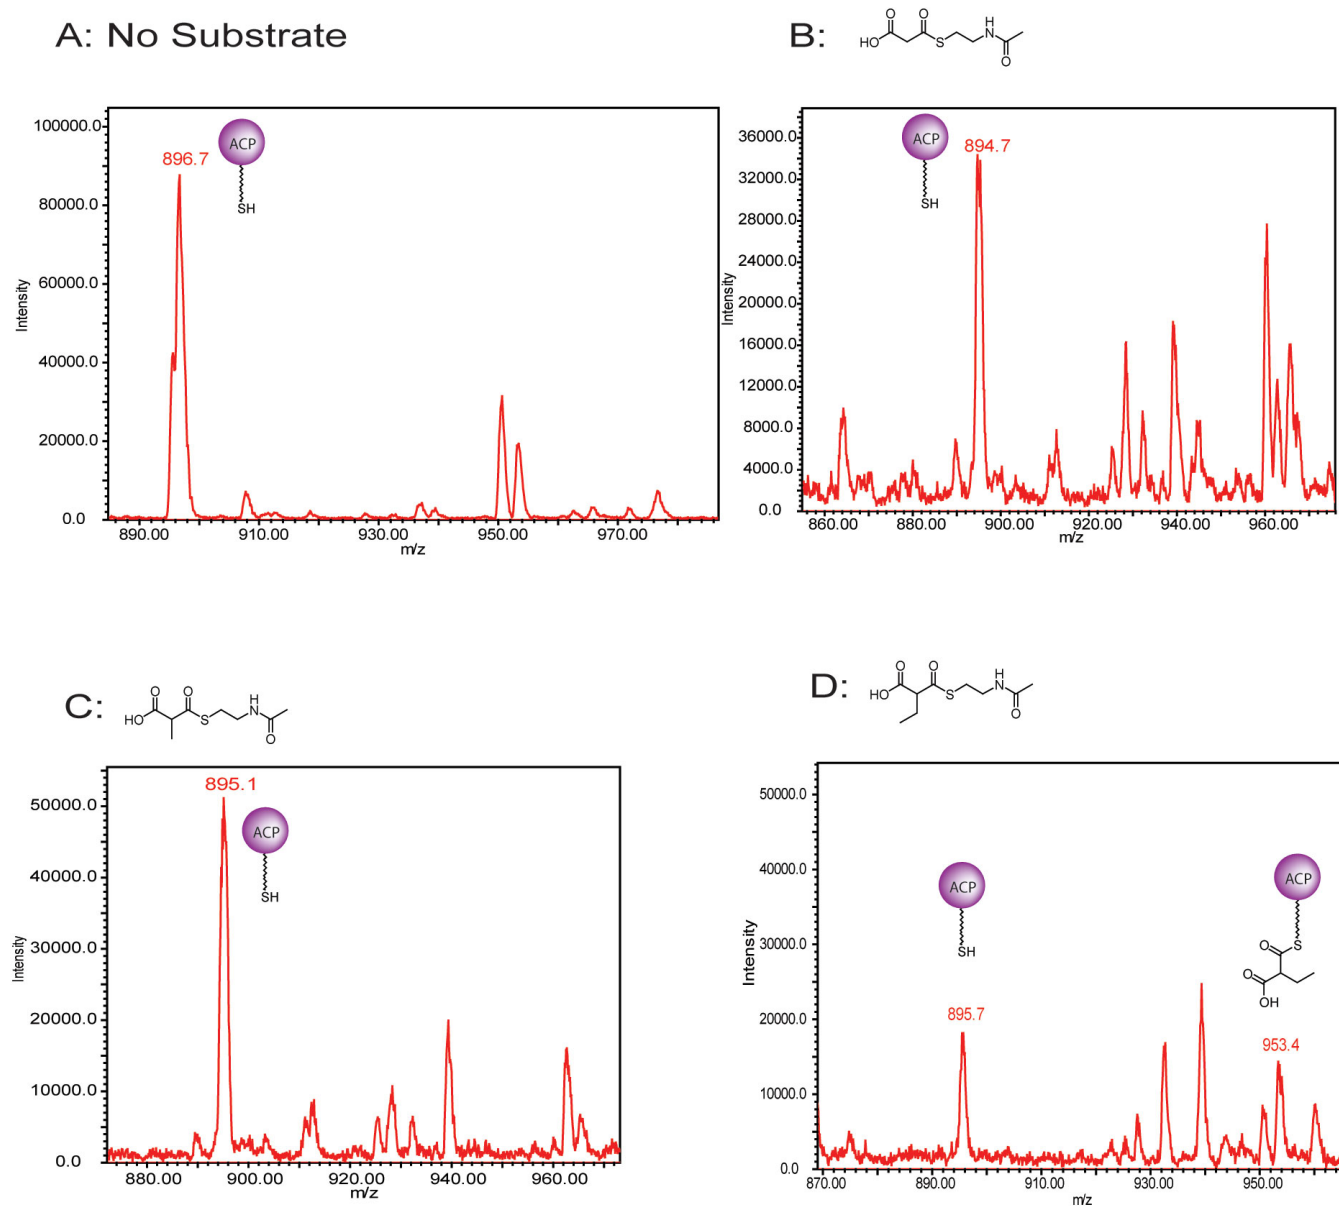

**Flu-KSAT3 loading:**

To a mixture of KSAT3 (25  $\mu$ M) in 100 mM pH 7.0 phosphate buffer (50  $\mu$ L total volume) containing 2.5 mM TCEP at 4°C was added appropriate SNAc thioester substrate (5mM). The mixture was incubated 4°C for 60 min to achieve KS acylation. Sequence grade modified trypsin was added to prepare samples with final ratio trypsin:ACP to be 1:10 (w/w). The mixture was incubated for 60 min at 37 °C. Digestion was quenched by addition of equal volume of 10% formic acid. Digests were stored at -80 °C until analysis.

| Protein | Probe                  | Mass expected(m/z, z=+2) |
|---------|------------------------|--------------------------|
| KSAT3   | -                      | 1667.6                   |
| KSAT3   | 3-hydroxy-butyric-SNAc | 1710.1                   |

**(R)-3-hydroxybutyryl- SNAc**<sup>1</sup>H NMR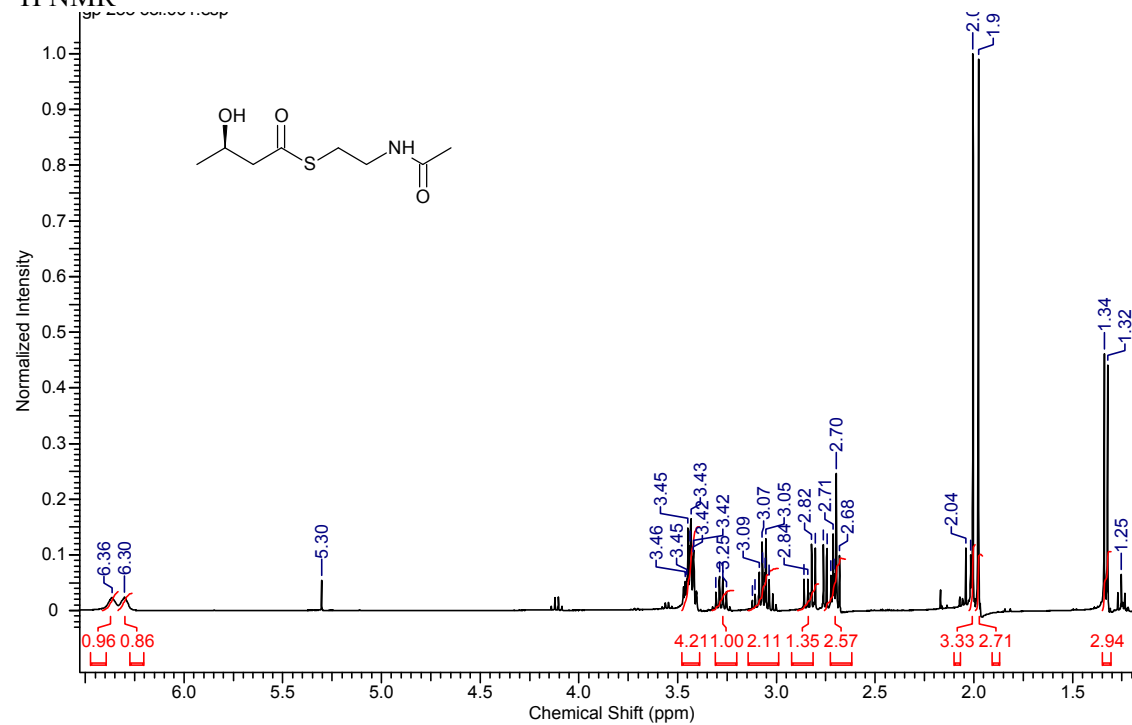<sup>13</sup>C NMR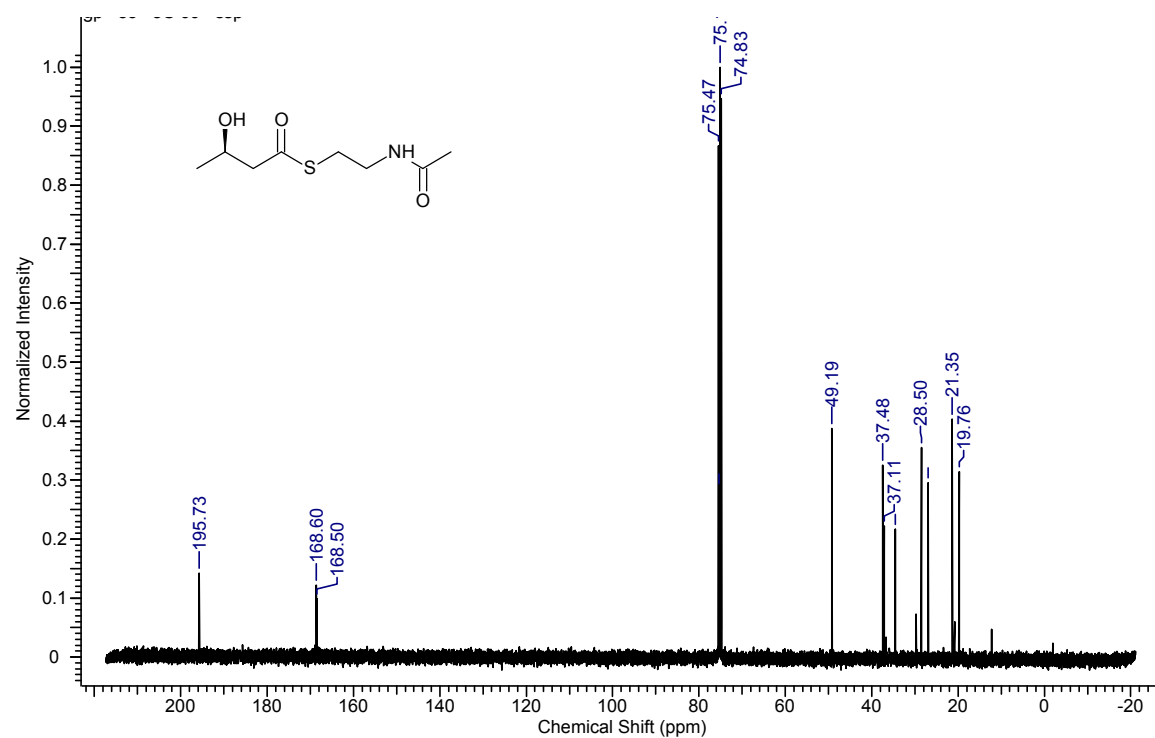

<sup>13</sup>C NMR (101 MHz, CH<sub>3</sub>Cl-*d*) ppm 19.76, 21.35, 26.95, 28.50, 34.57, 37.48, 49.19, 168.60, 195.73

**(S)-3-hydroxybutyryl-SNAc**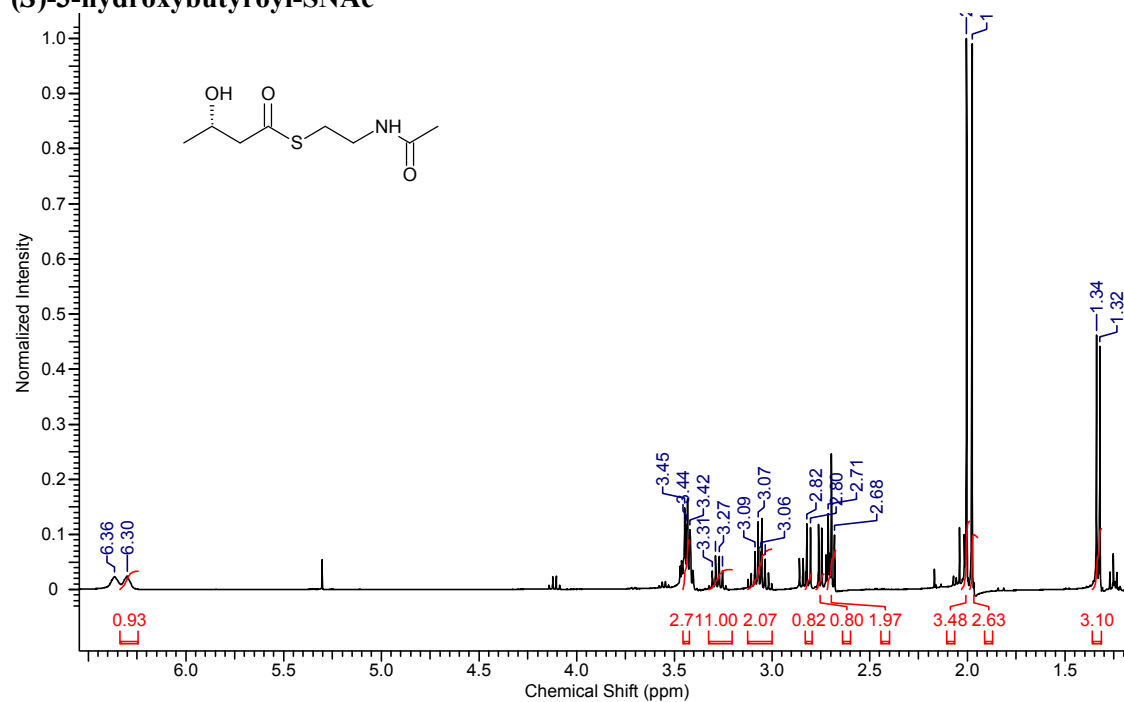**<sup>13</sup>C NMR**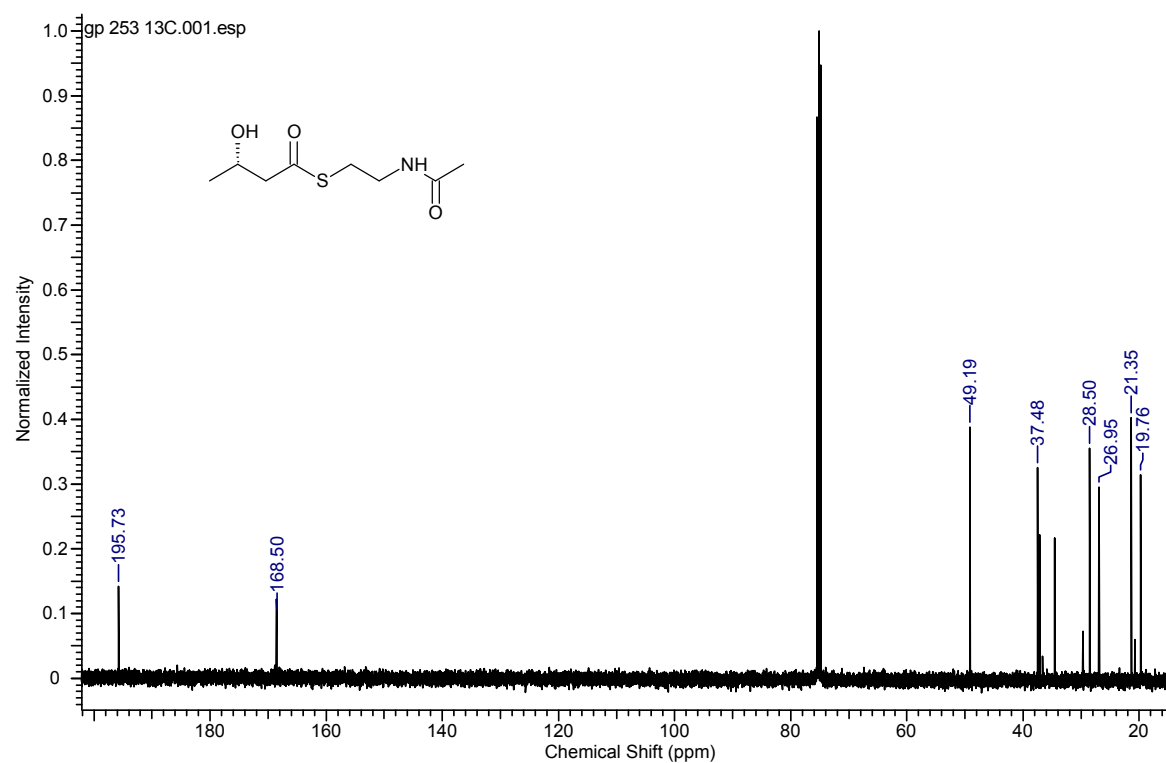

**Ethylmalonyl-SNac**<sup>1</sup>H NMR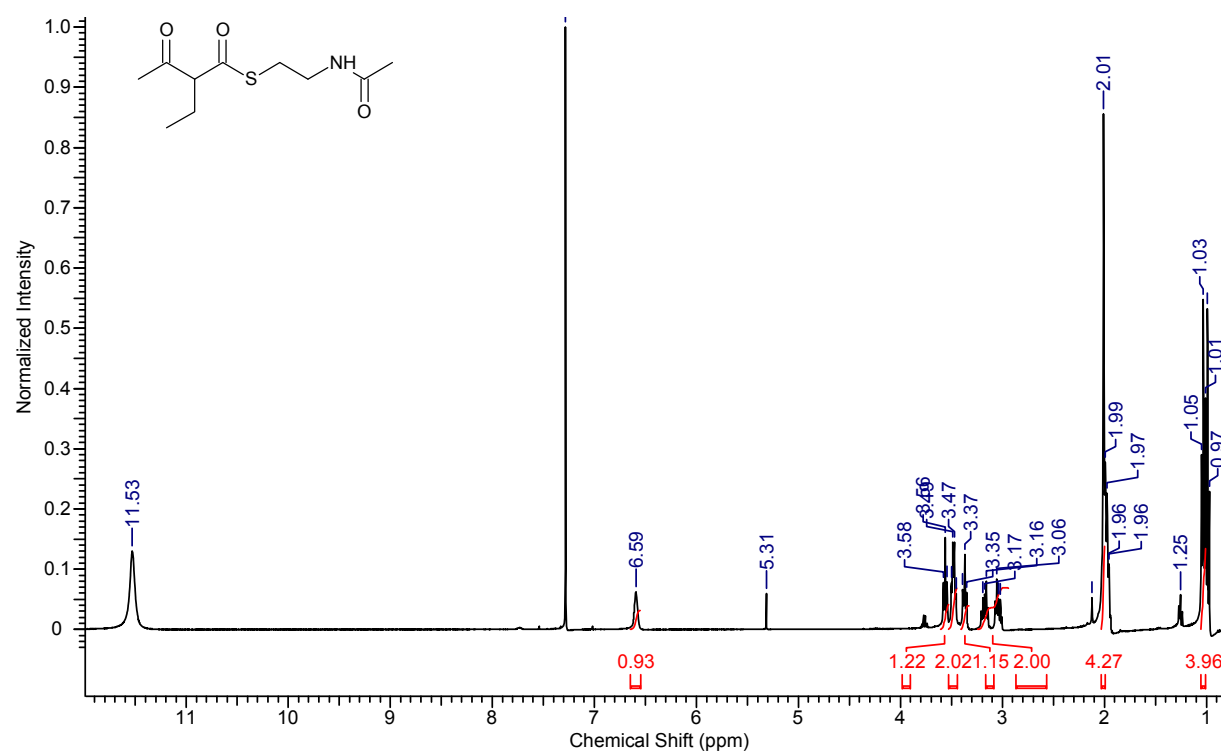<sup>13</sup>C NMR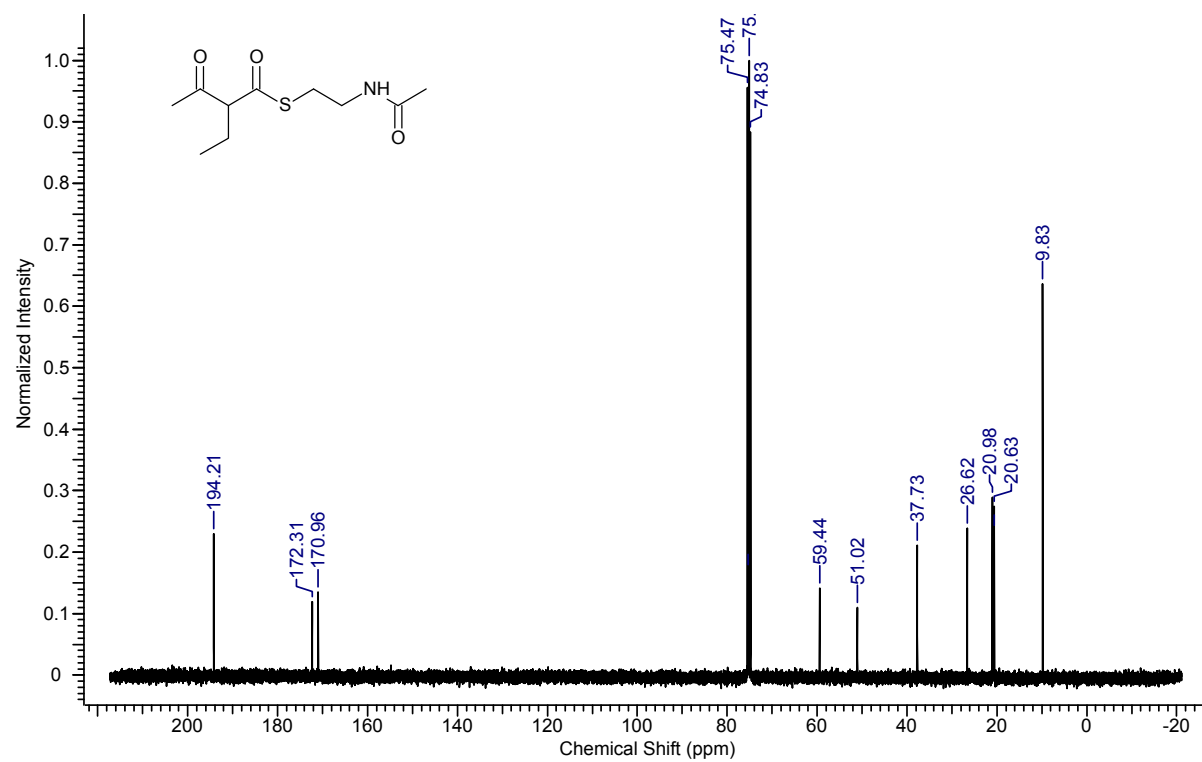

## Methylmalonyl-SNac

 $^1\text{H}$  NMR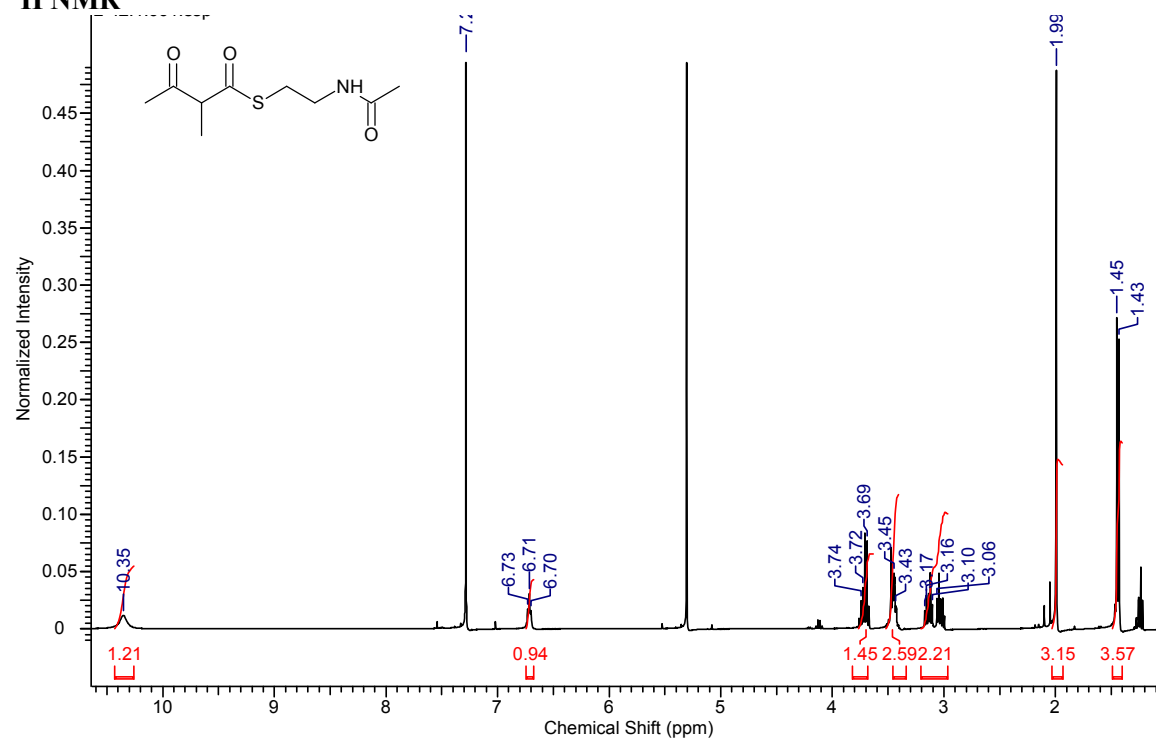 $^{13}\text{C}$  NMR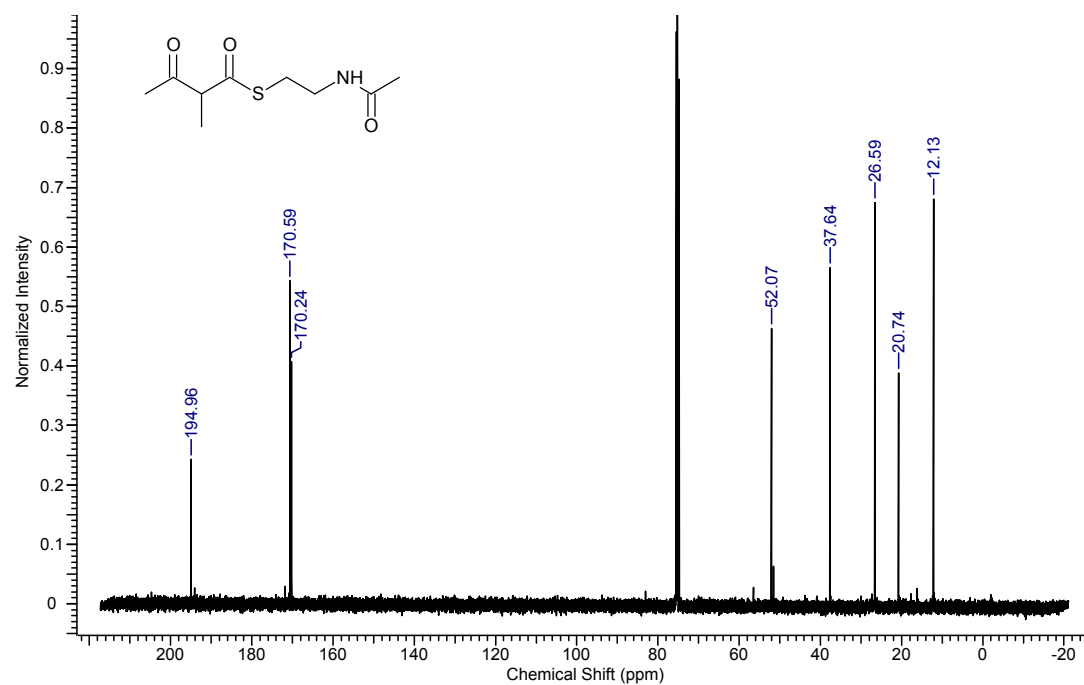

## Malonyl-SNAc

 $^1\text{H}$  NMR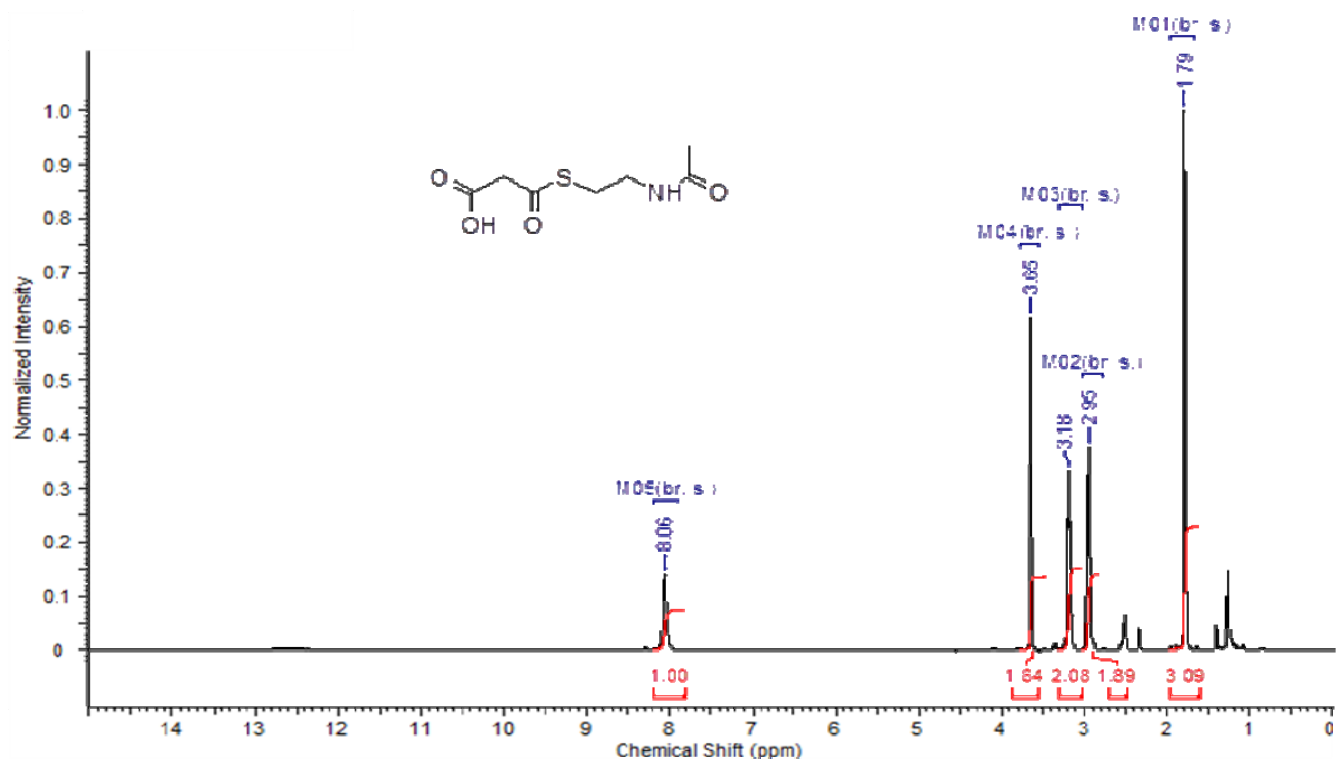 $^{13}\text{C}$  NMR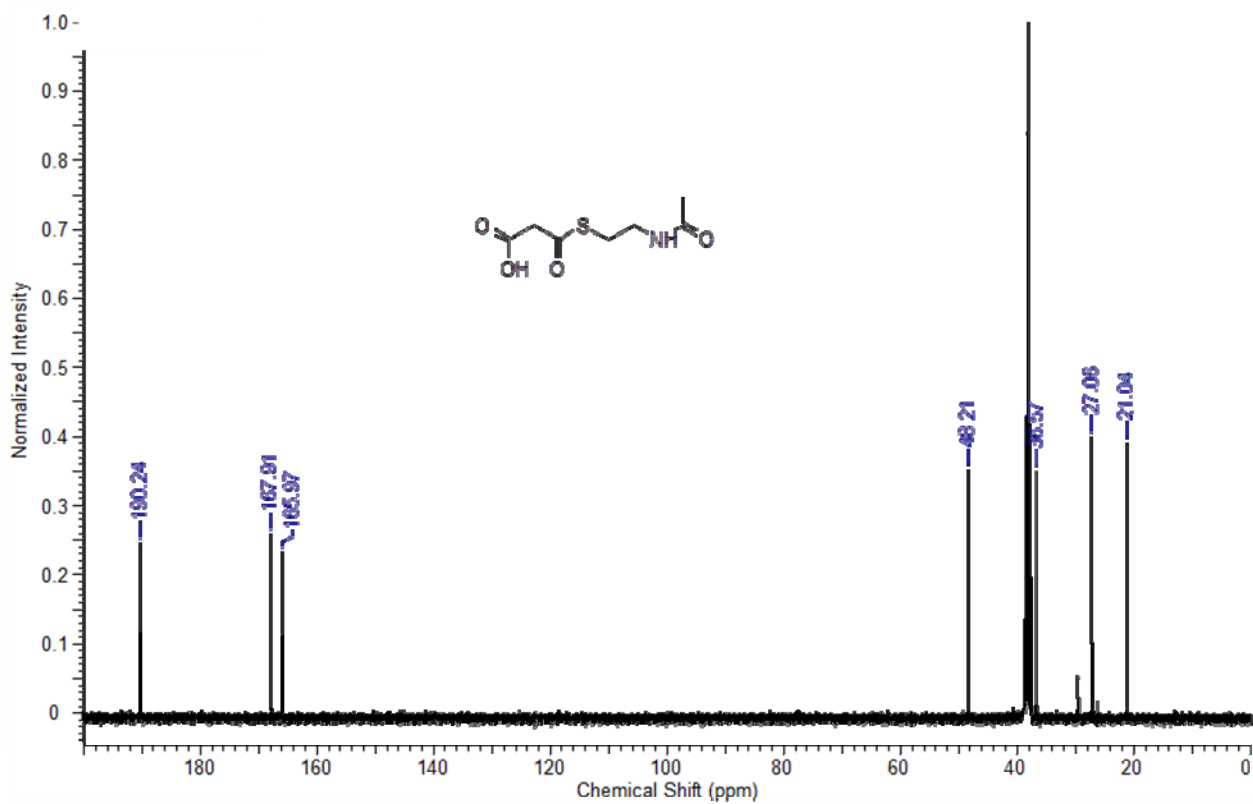

Supplement: NIHMS639904-supplement-supporting_information.pdf [file NIHMS639904-supplement-supporting_information.pdf]
